# Supplementary material
Source: publisher figshare collection journal article supplement (https://tandf.figshare.com/ndownloader/files/14199131)
Supplement: Supplementary file 1 [file 14199131]

Article title: In silico hit optimization towards AKT inhibition: Fragment-based approach, molecular docking and molecular dynamics study

Author names: Elkin Eduardo Sanabria-Chanagaa, Irene Betancourt-Condeb, Alicia Hernández-Camposa, Alfredo Téllez-Valenciab, Rafael Castilloa*

Affiliations: aFacultad de Química, Departamento de Farmacia, Universidad Nacional Autónoma de México, Ciudad de México, C.P. 04510, Mexico.

bFacultad de Medicina y Nutrición, Universidad Juárez del Estado de Durango, Av. Universidad y Fanny Anitúa S/N, Durango, Durango, C.P. 34000, Mexico.

Email address: [rafaelc@unam.mx](mailto:rafaelc@unam.mx)

Supporting Information


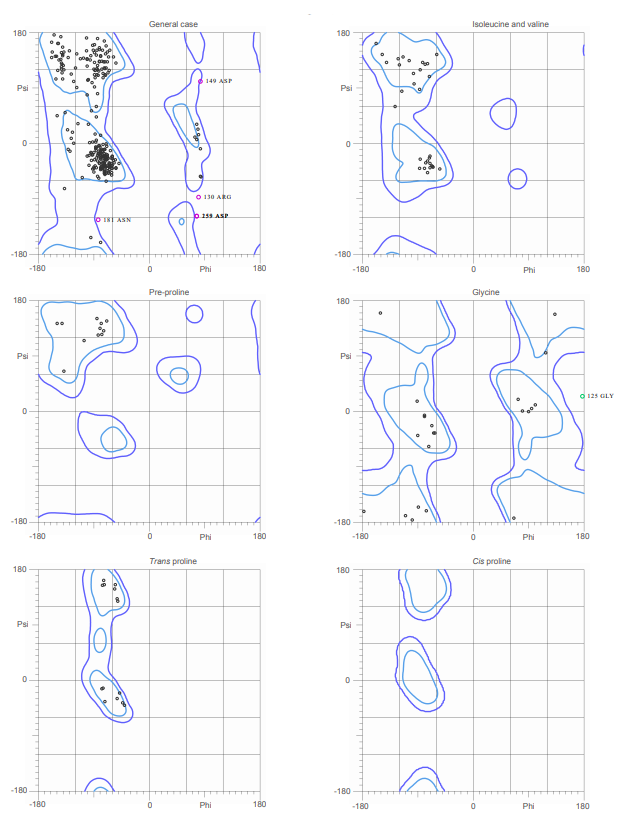

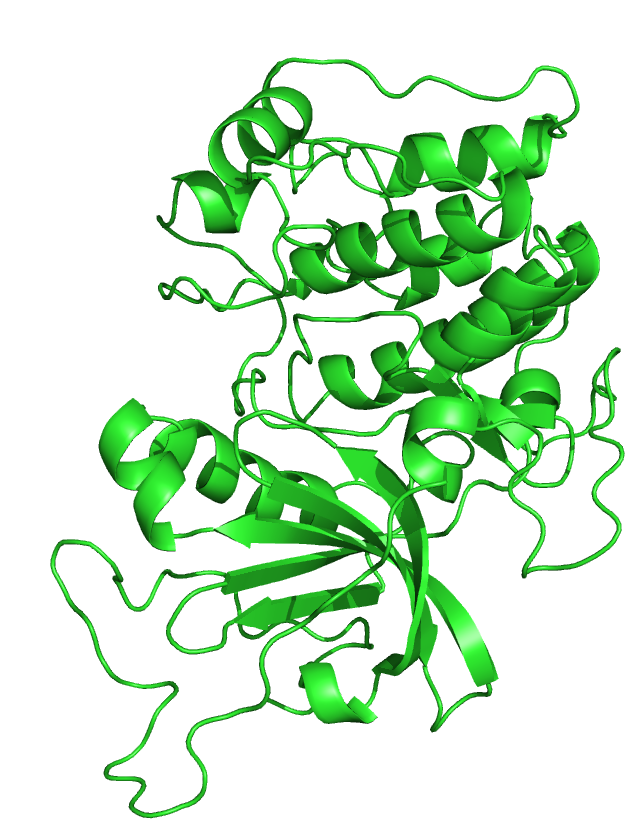


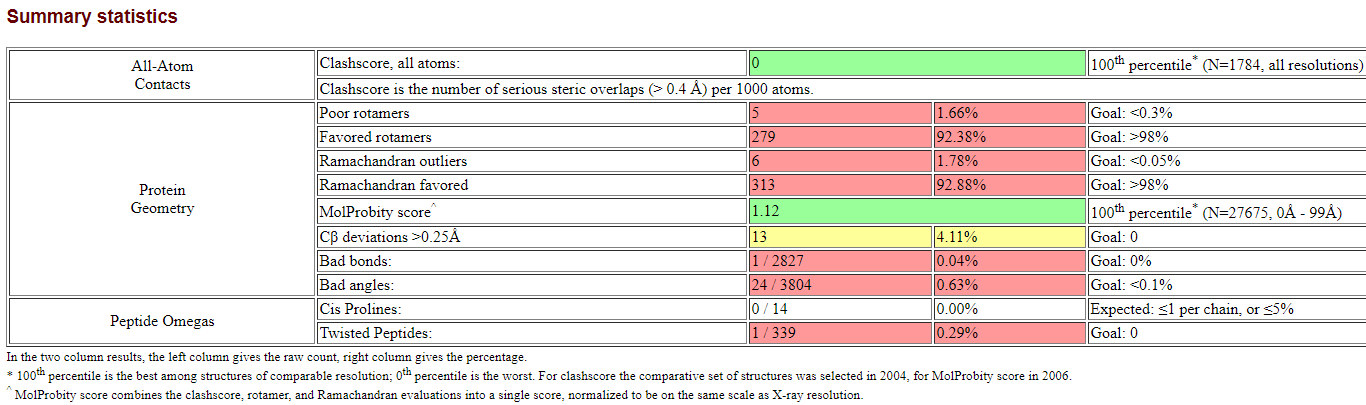


Figure S1. Validation of AKT3homology model.

2E in AKT1

1E in AKT1

3E in AKT1

FragFp


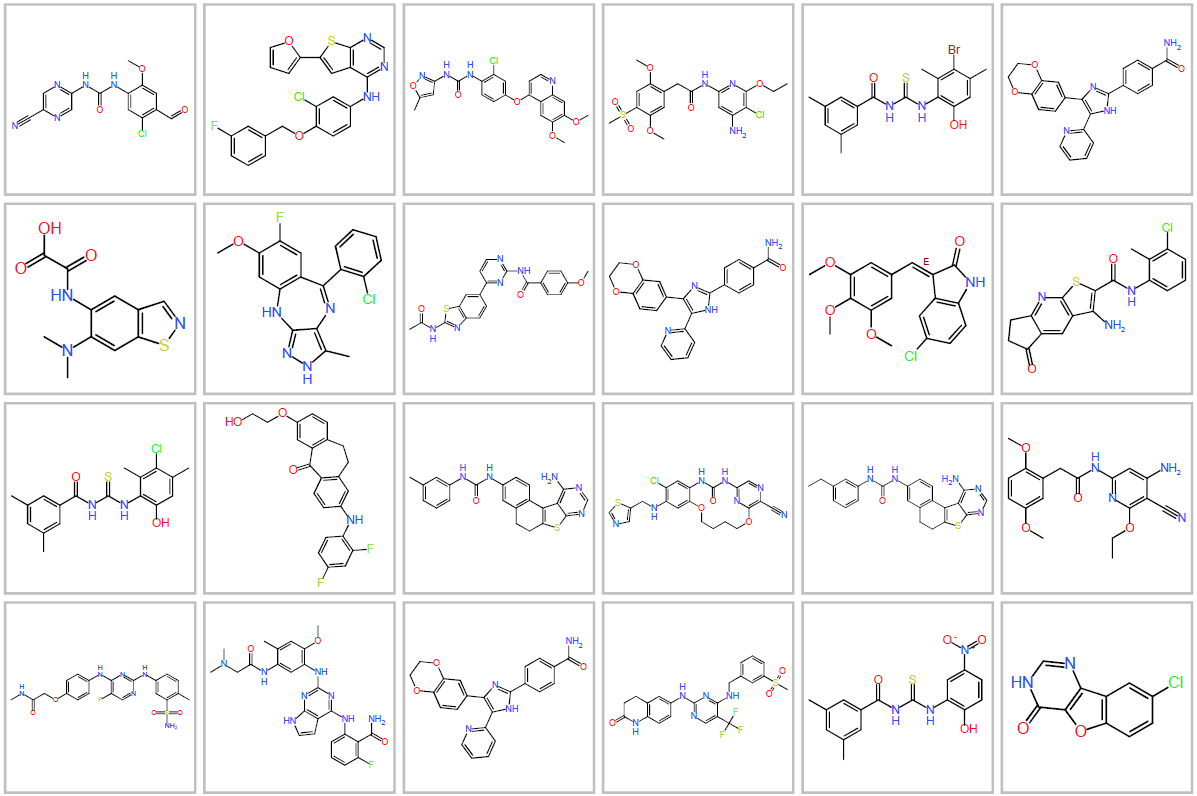

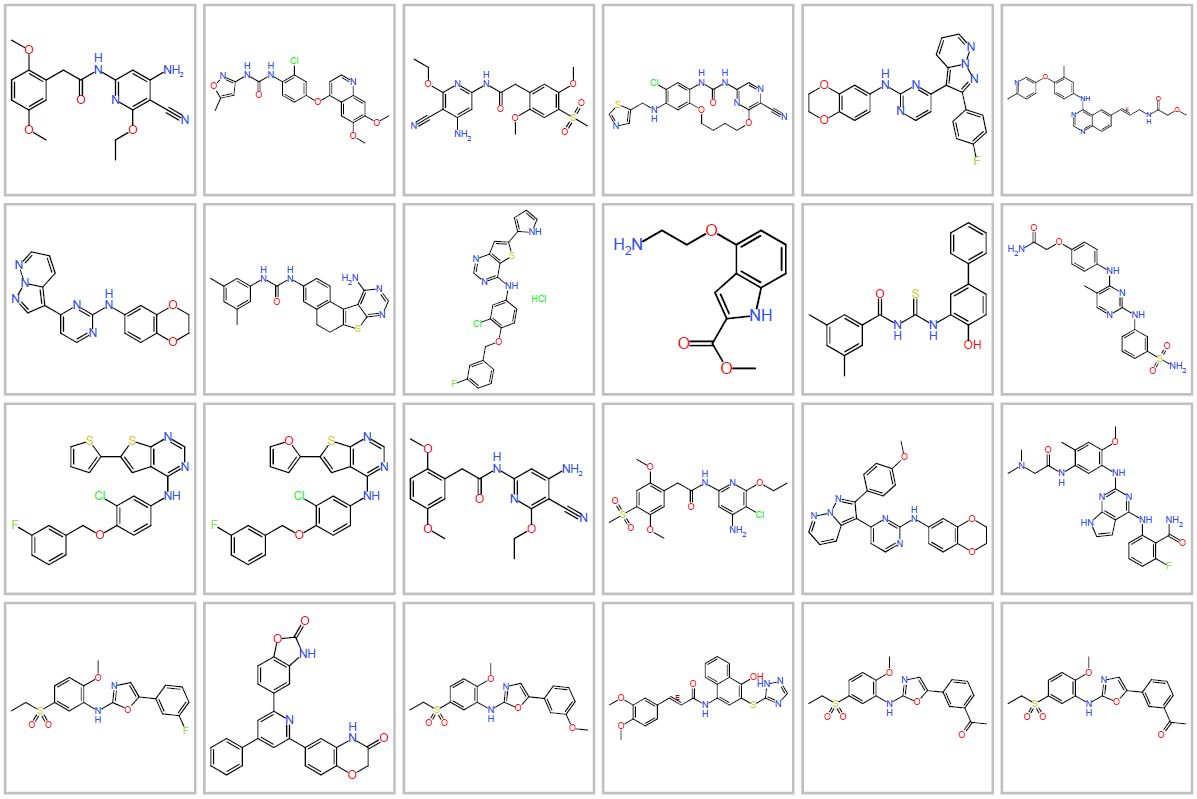

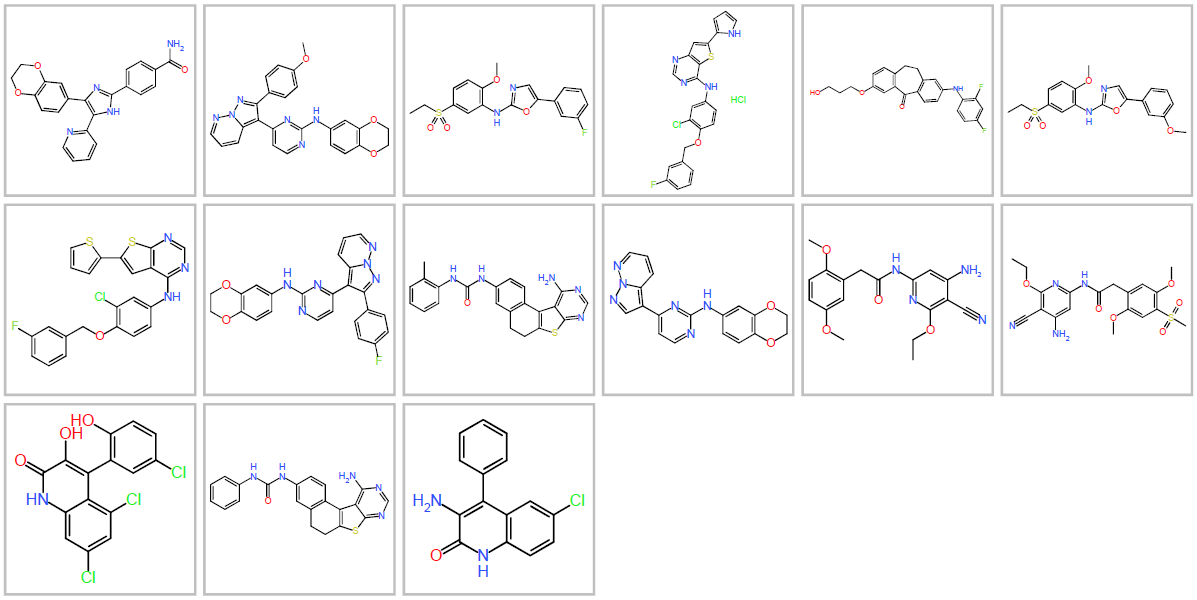


PathFp


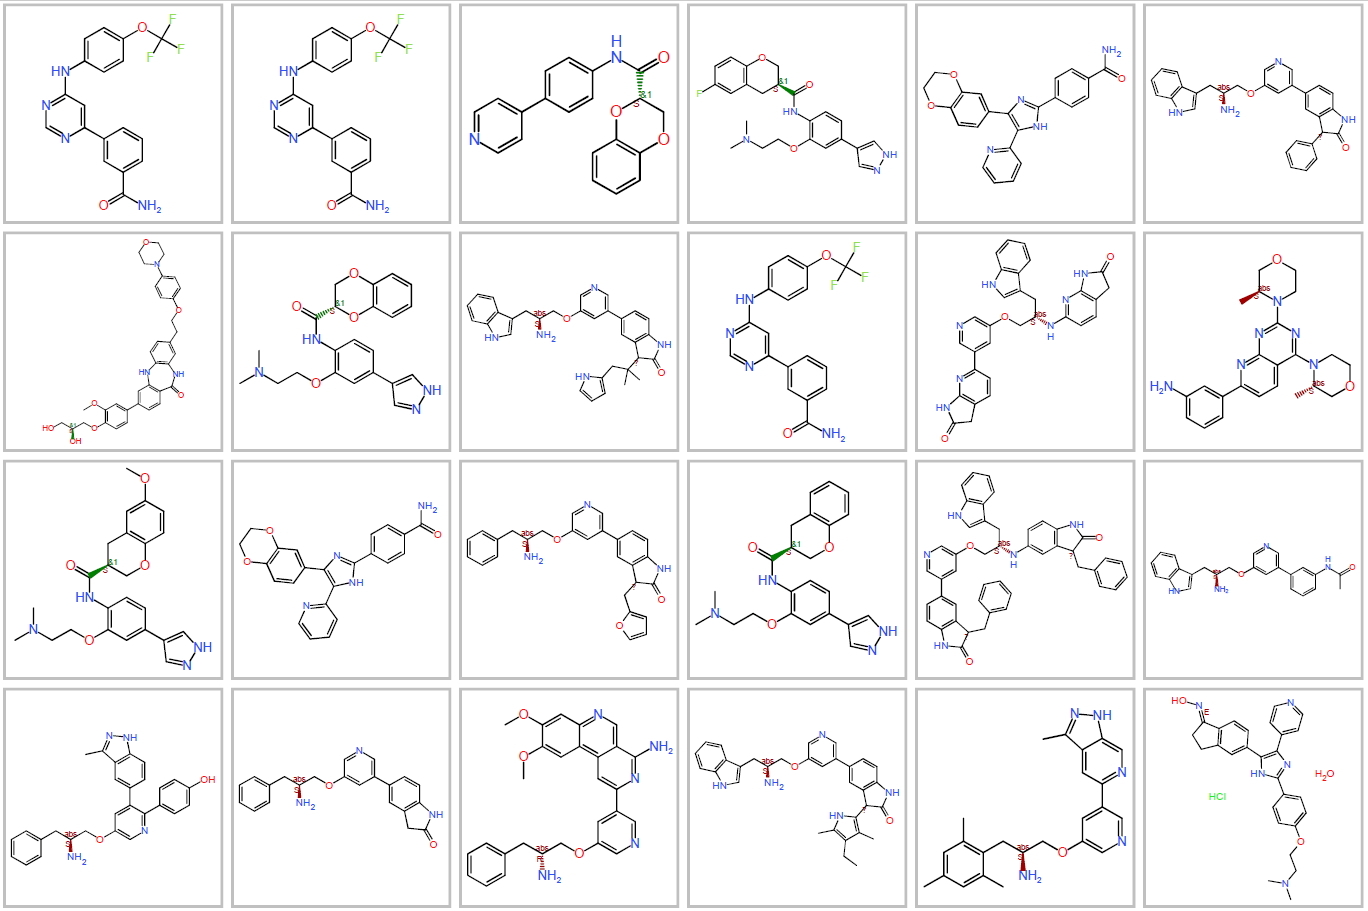

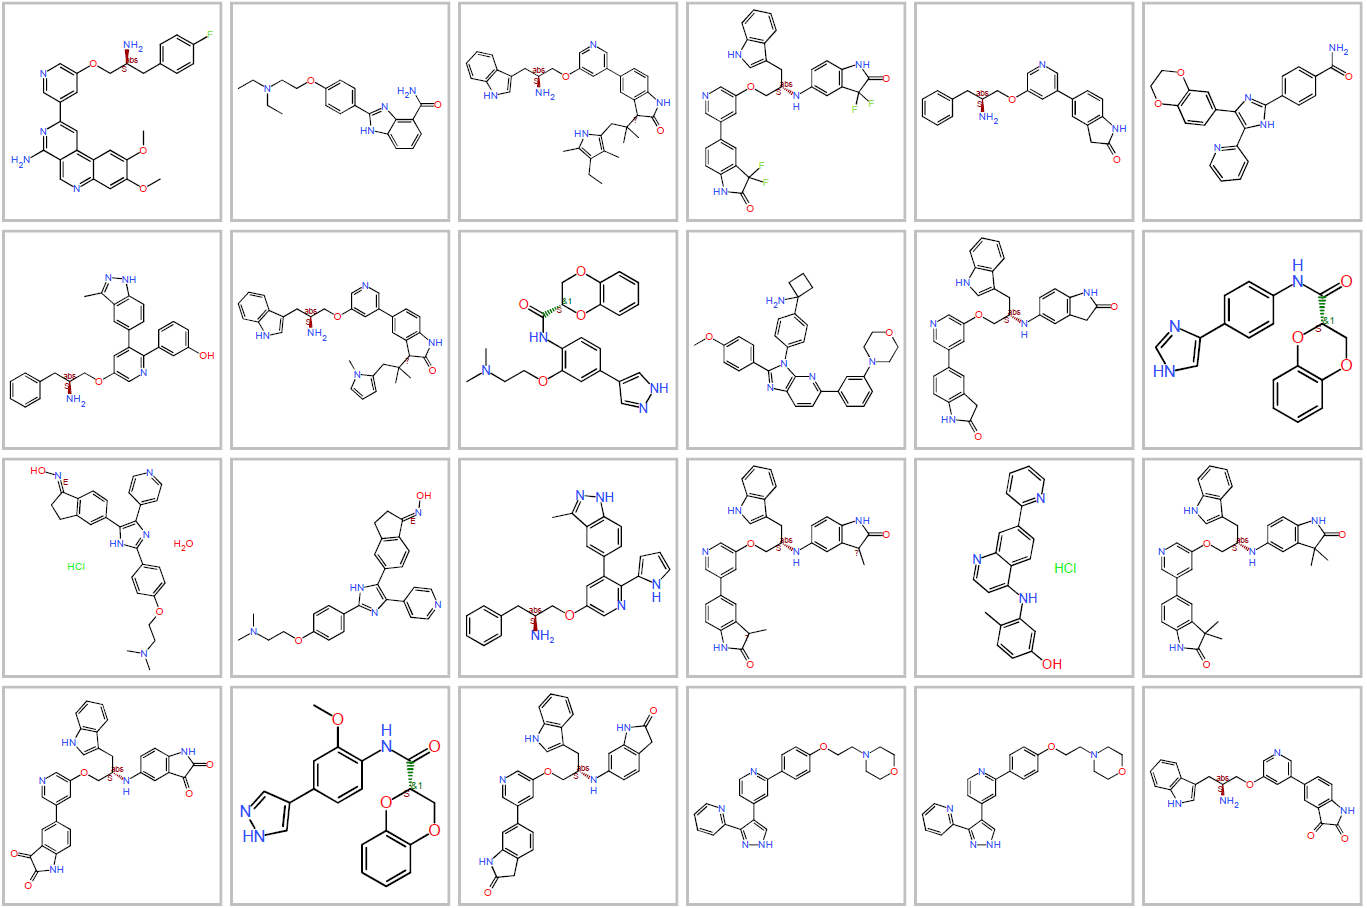


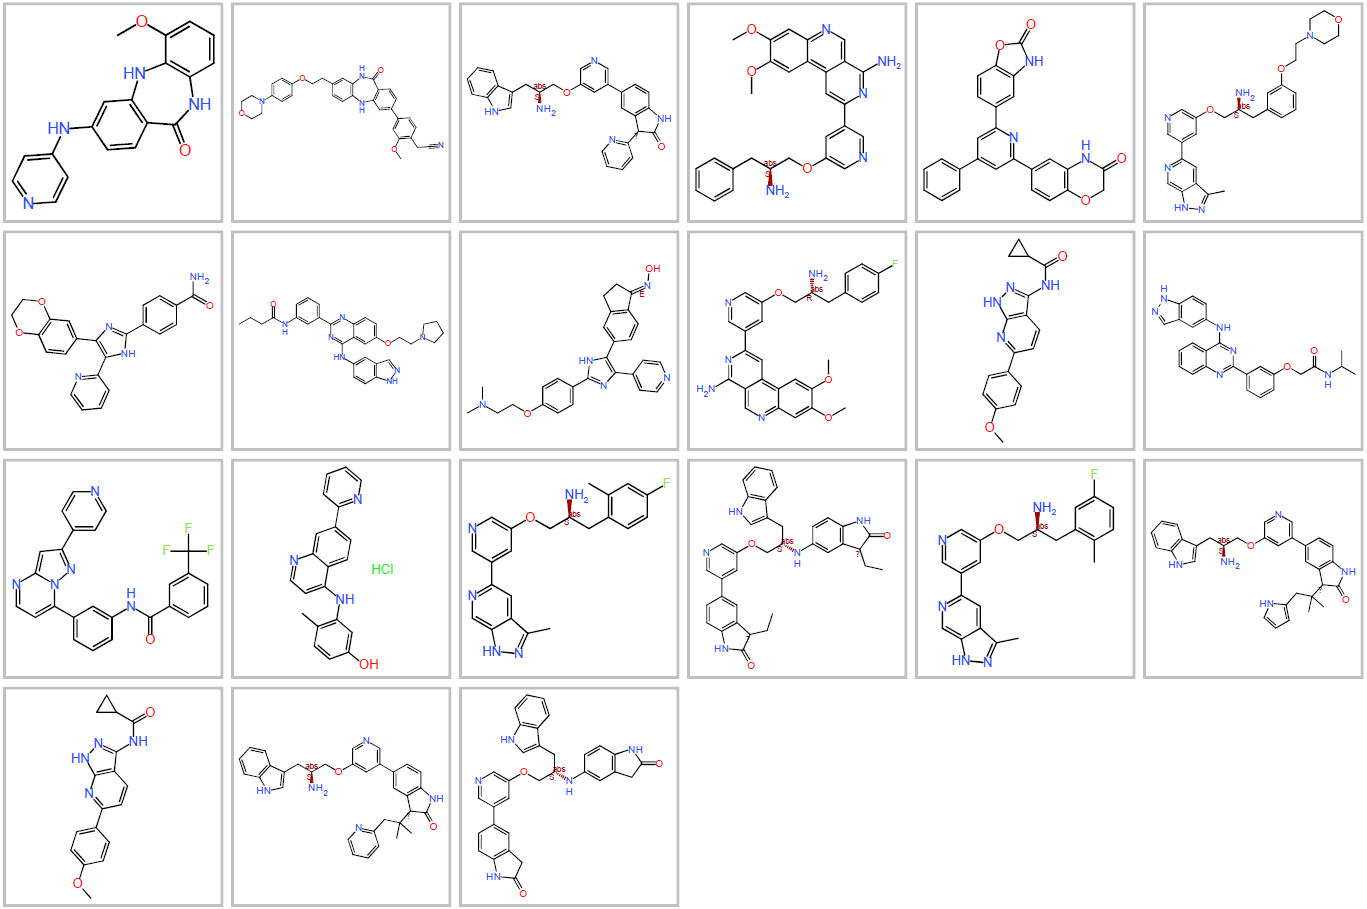


Figura S3.1. Structures with a Tanimoto coefficient of 0.6 for series A using FragFp and PathFp.

FragFp


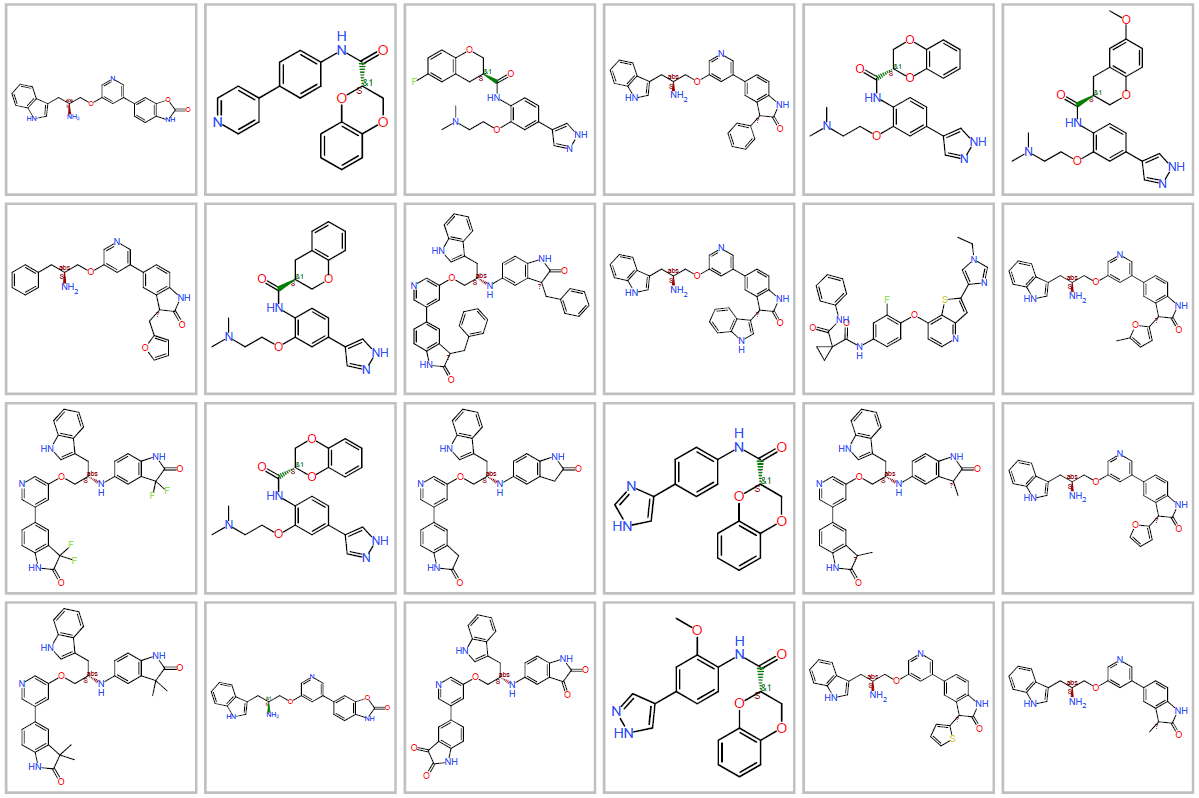

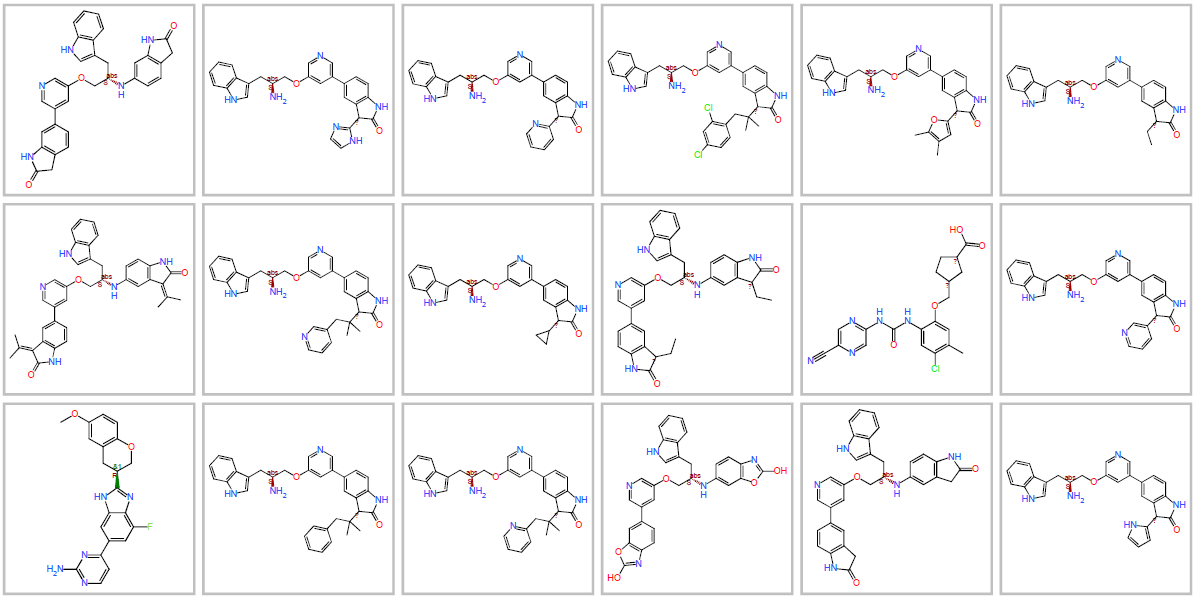


PathFp


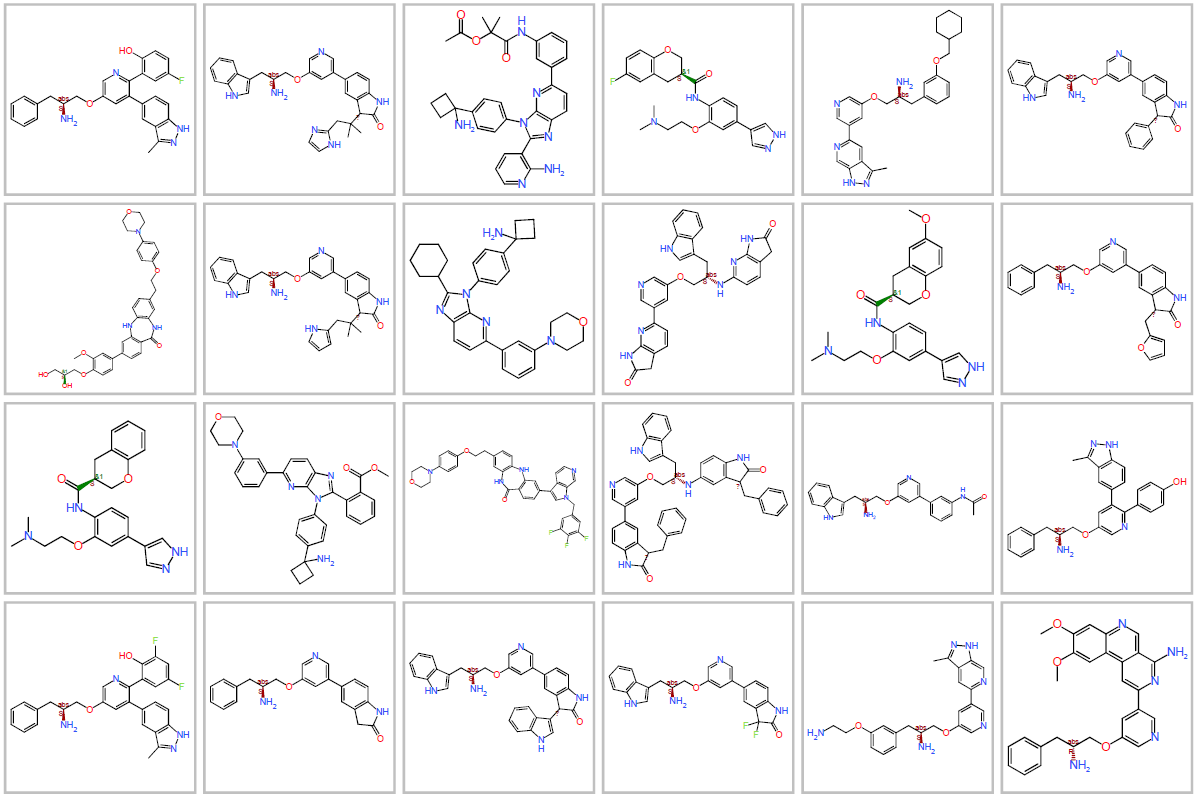

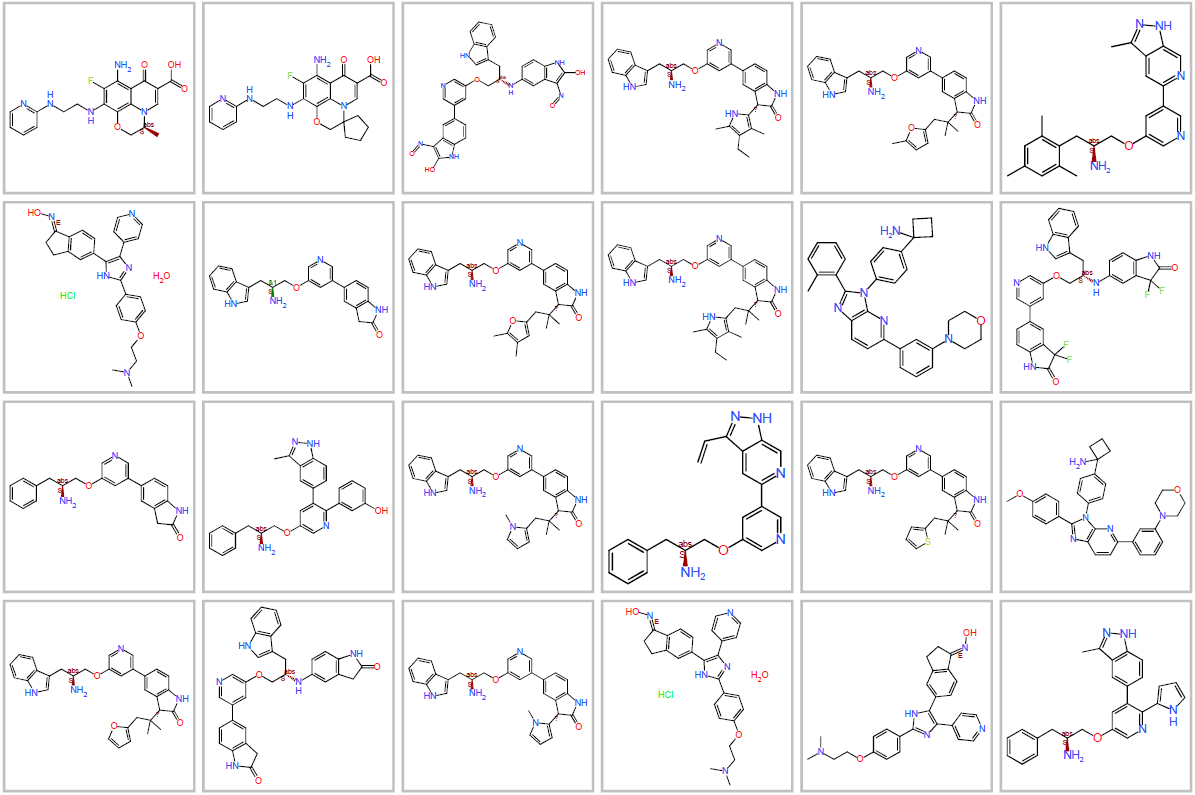


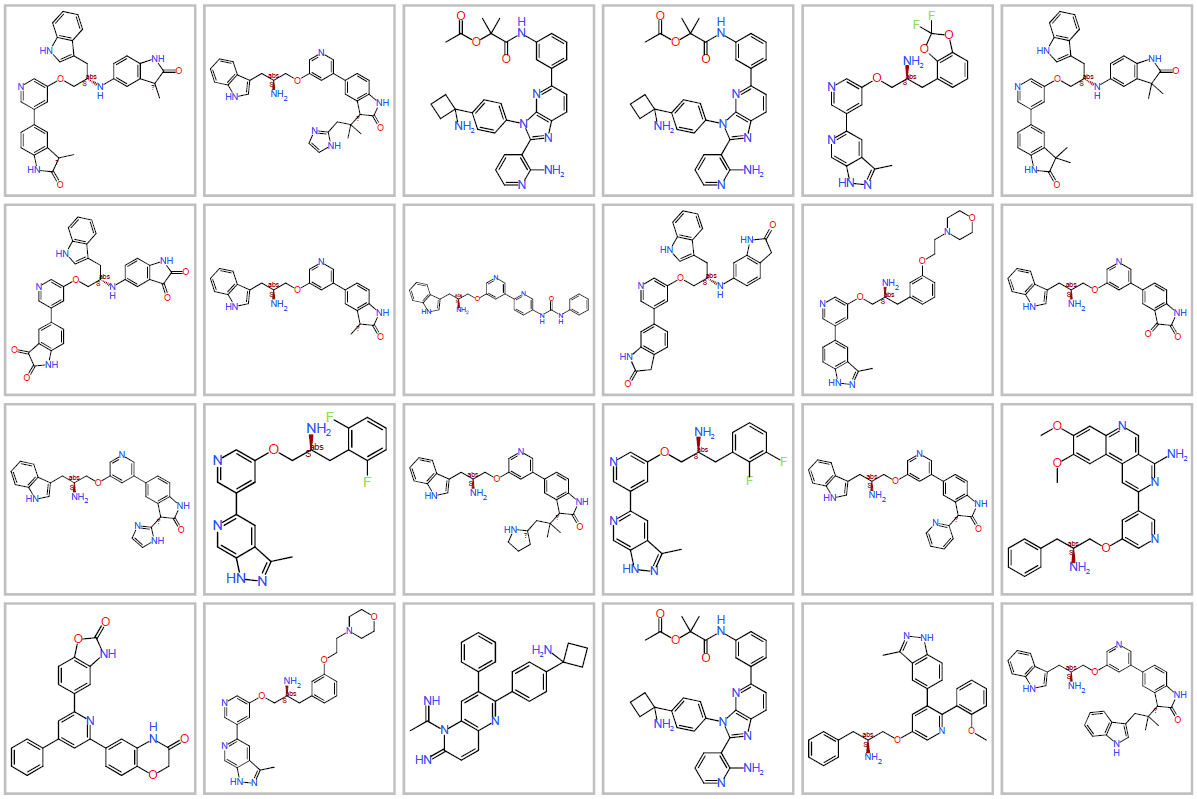

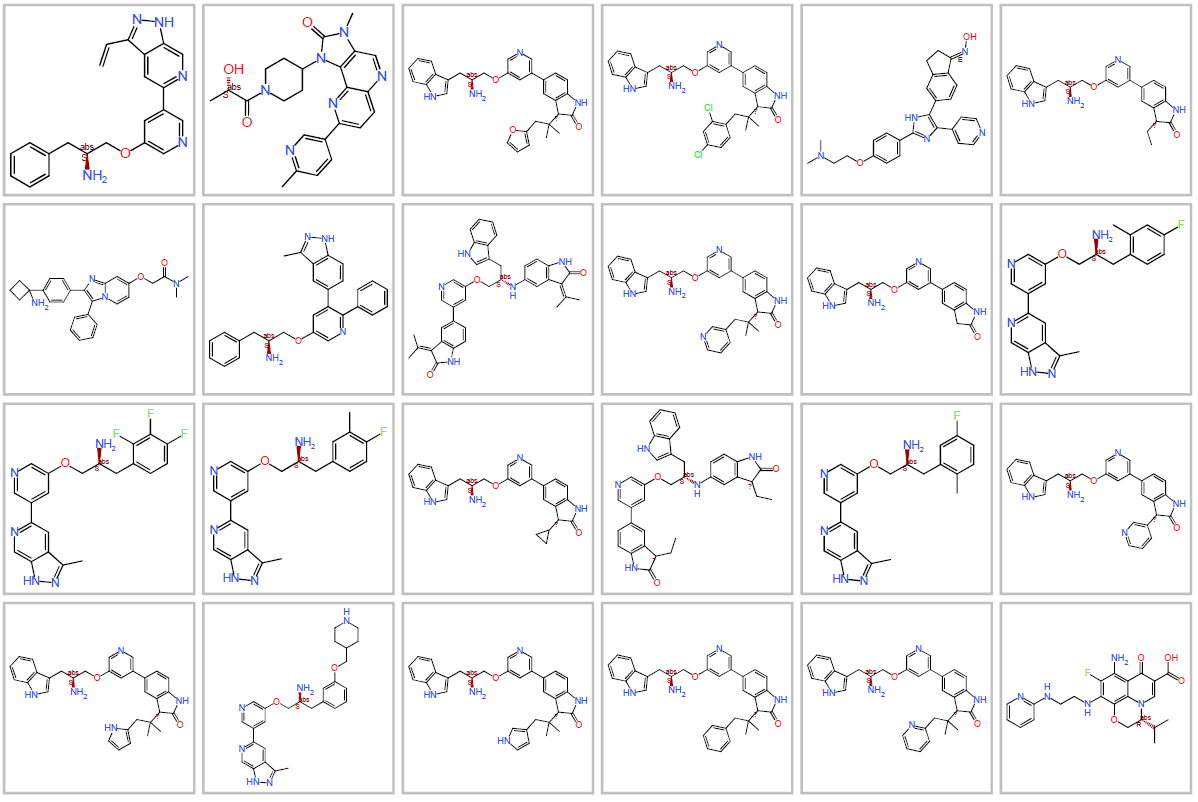


Figura S3.2. Structures with a Tanimoto coefficient of 0.6 for series C using FragFp and PathFp.

FragFp


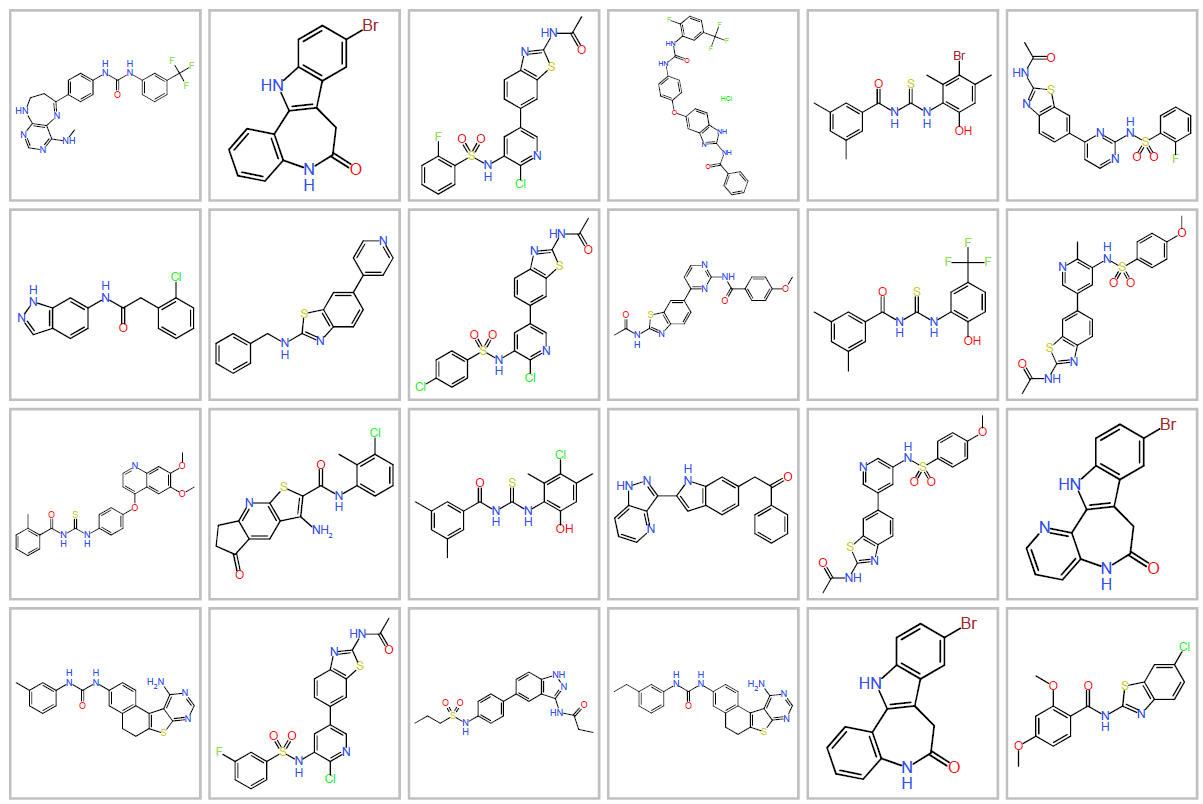

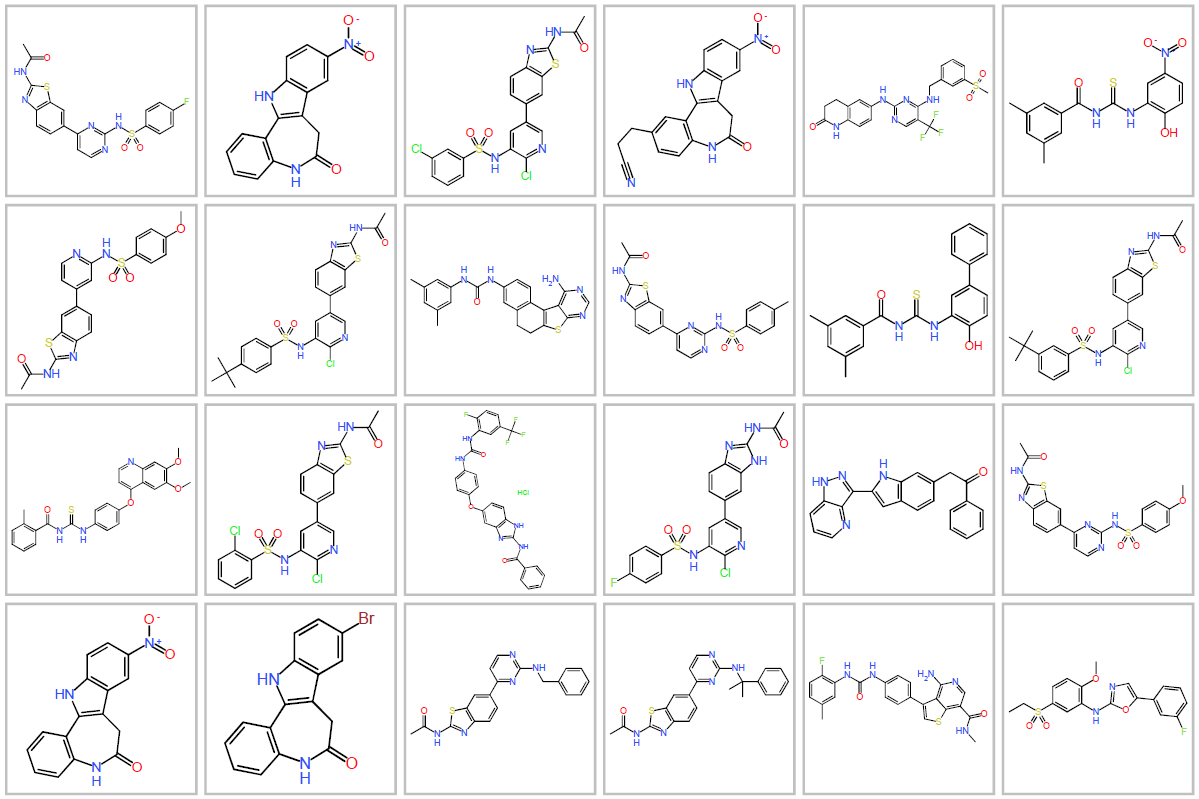

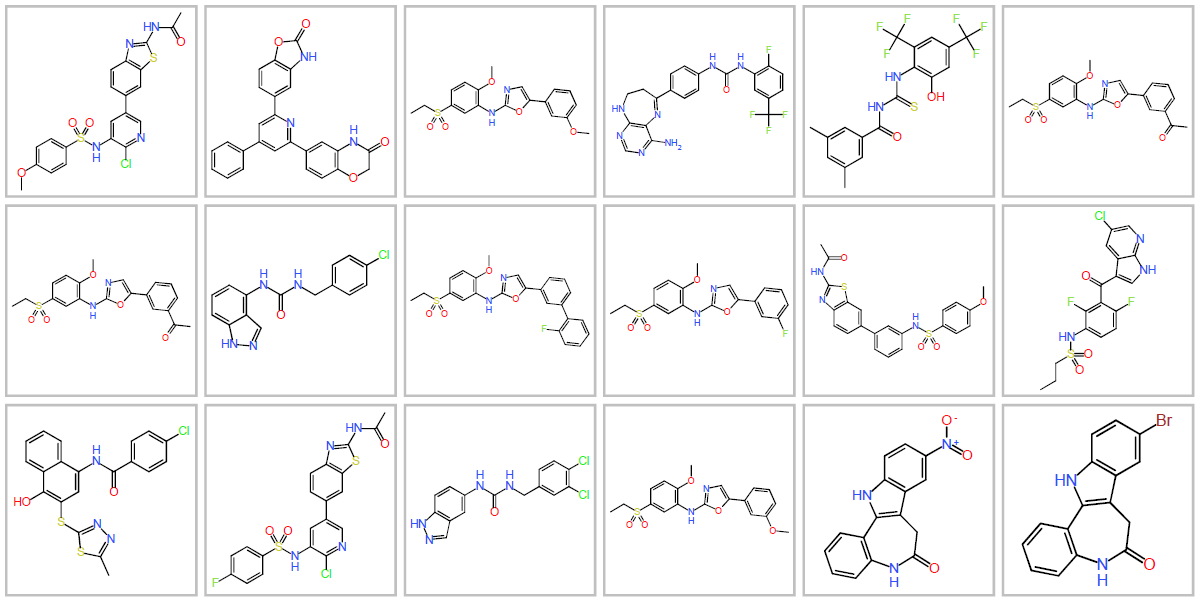

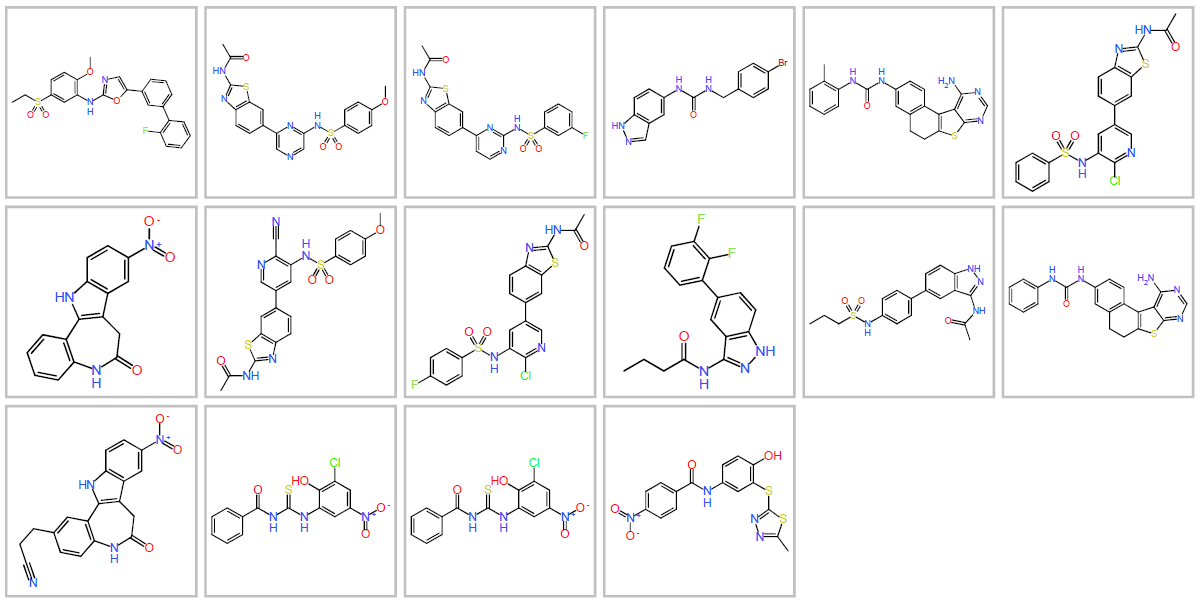


PathFp


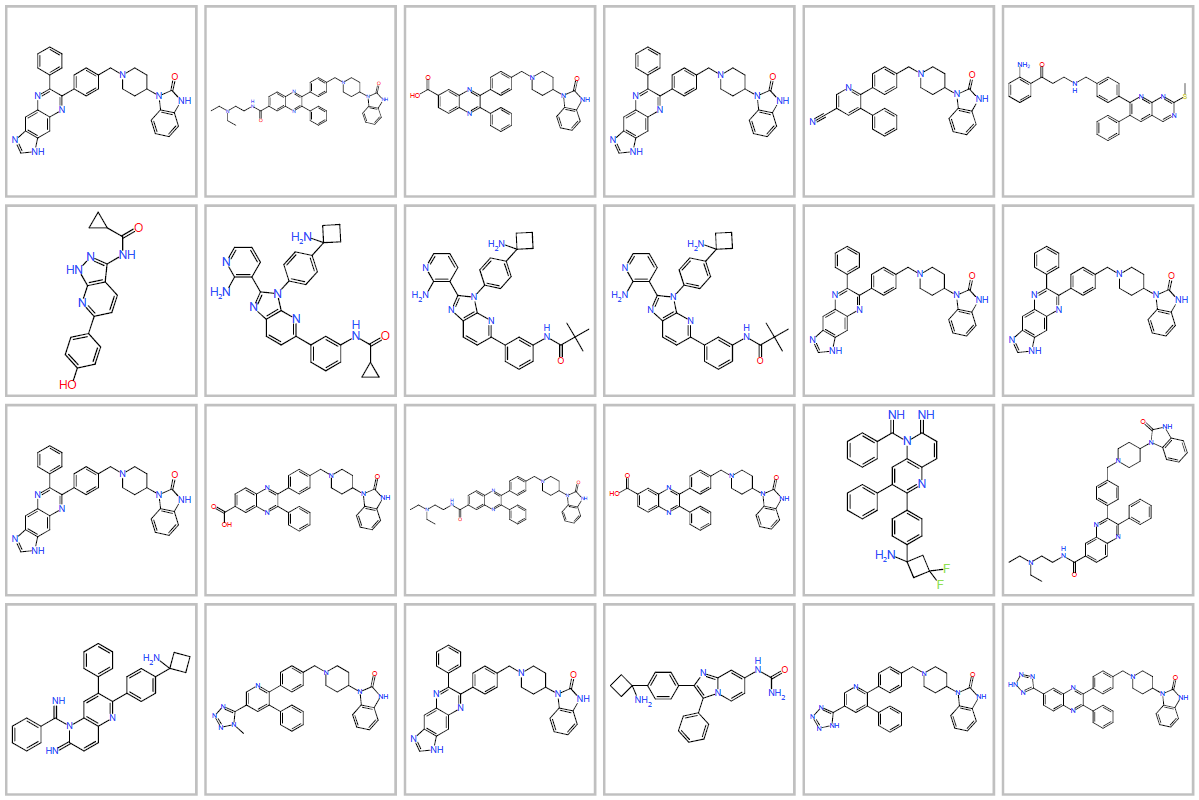

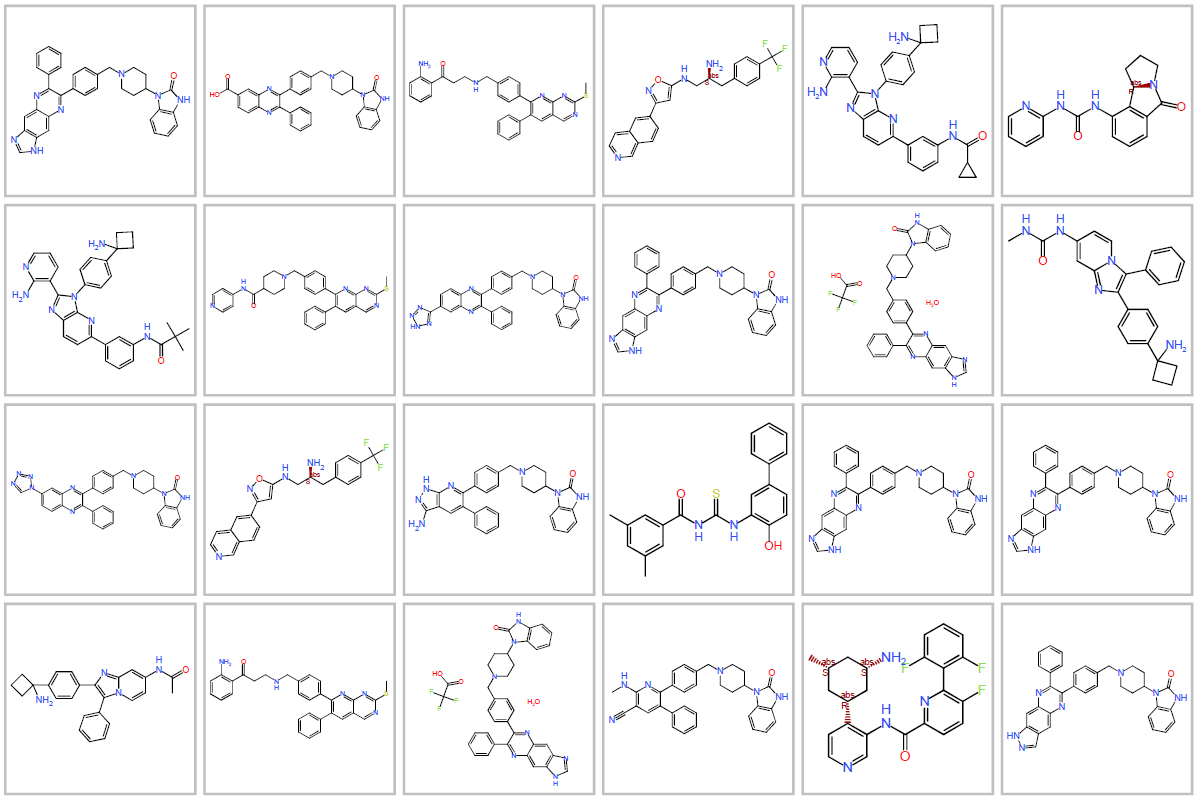

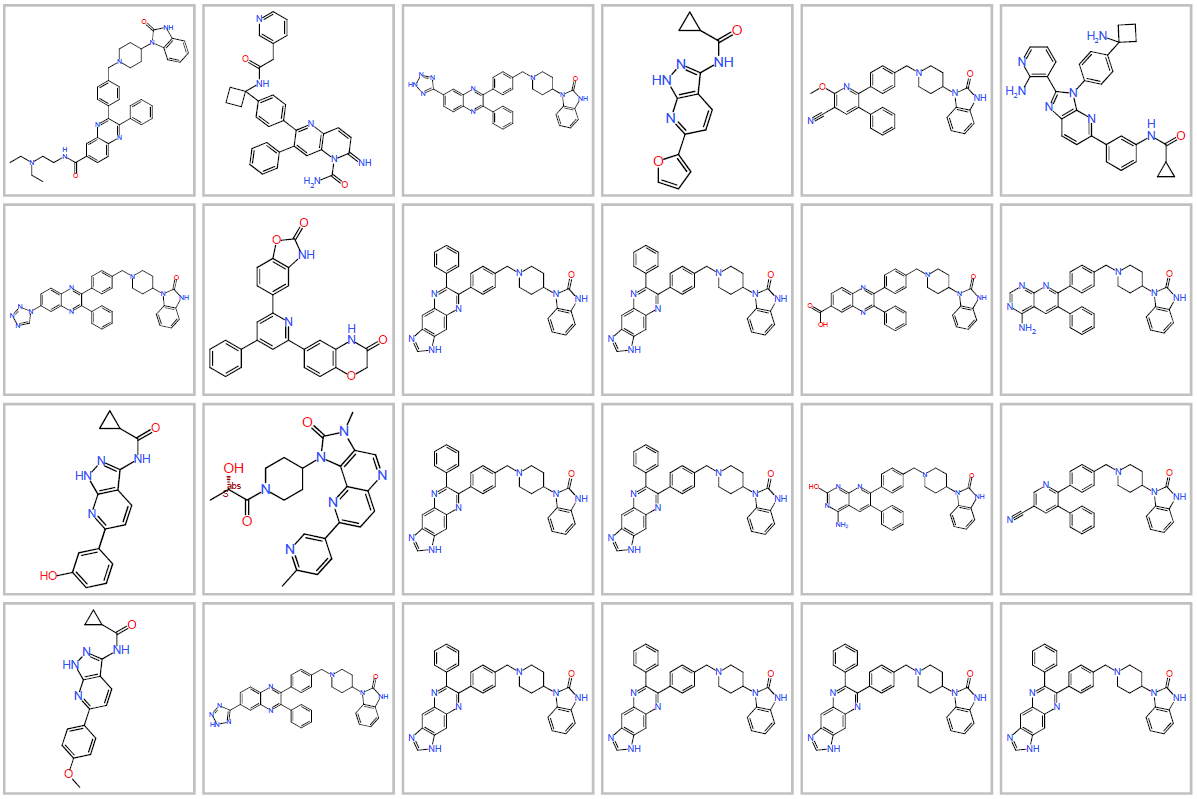

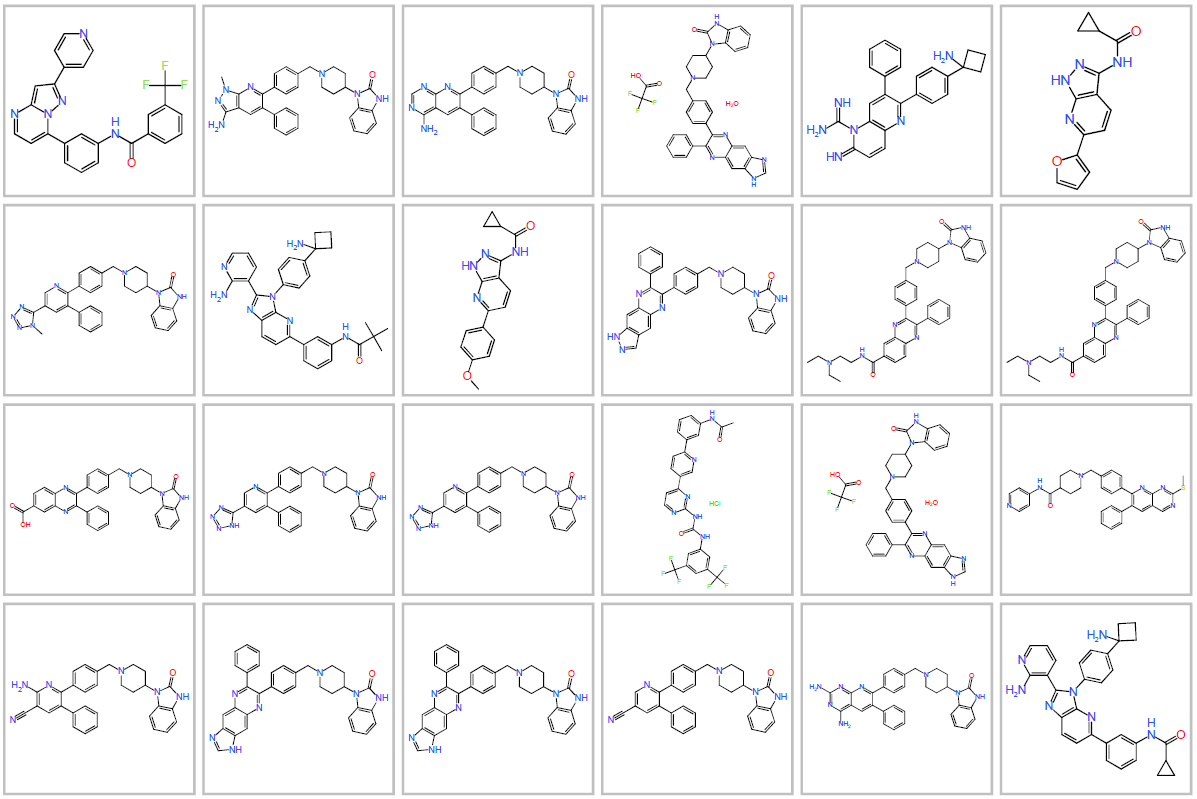

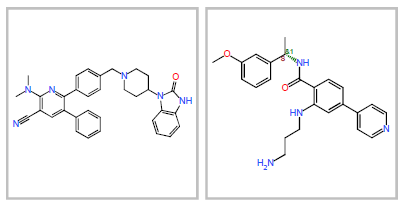


Figura S3.3. Structures with a Tanimoto coefficient of 0.6 for series D using FragFp and PathFp.

FragFp


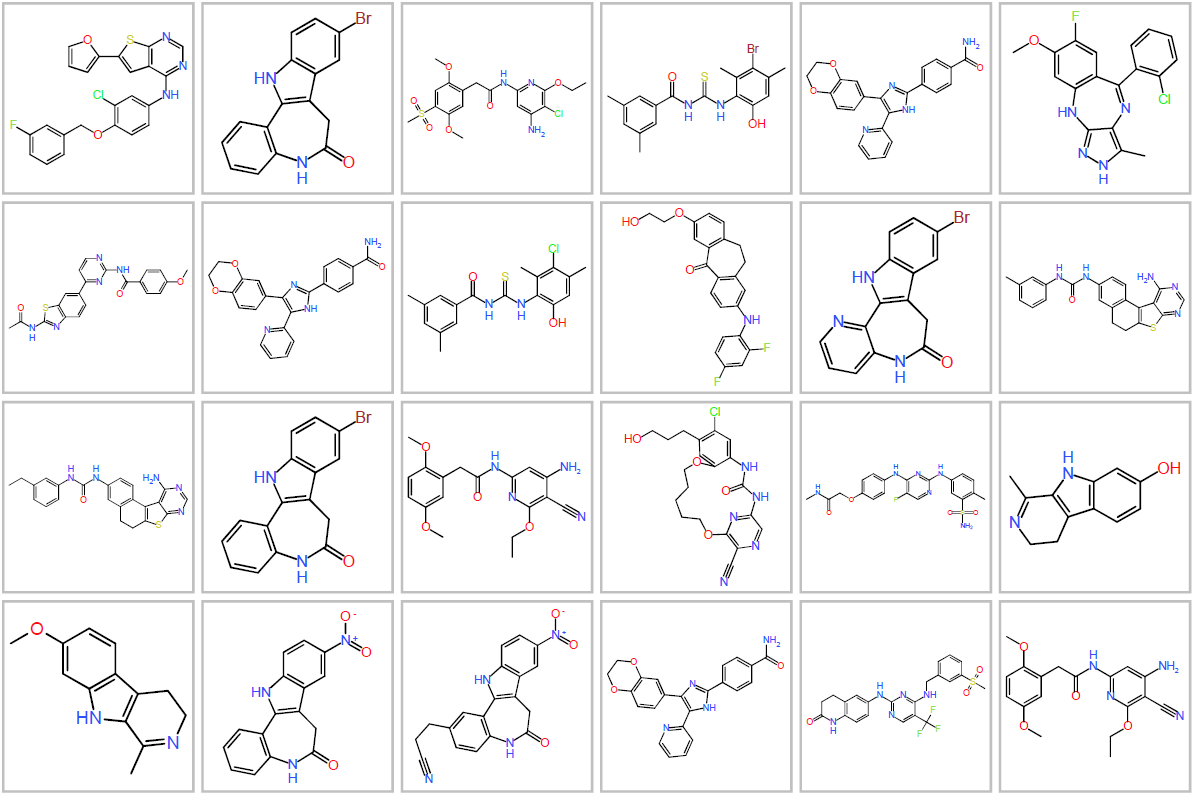

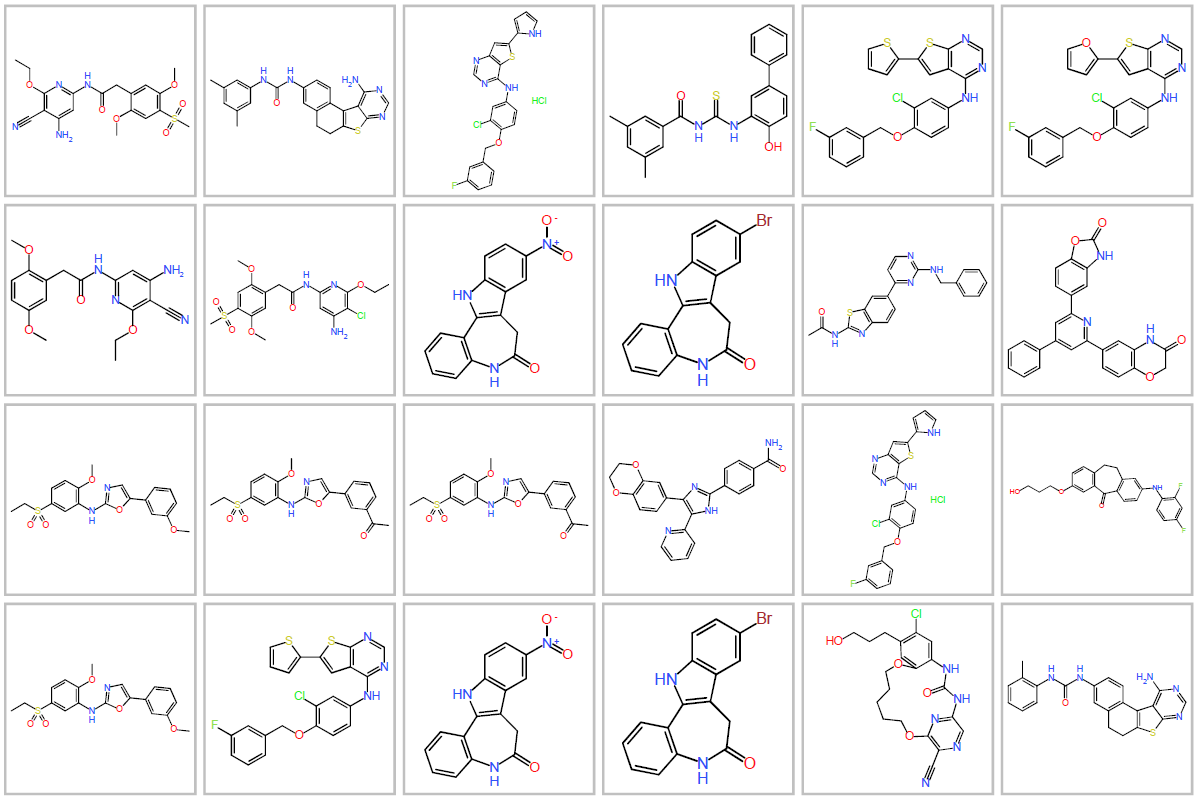


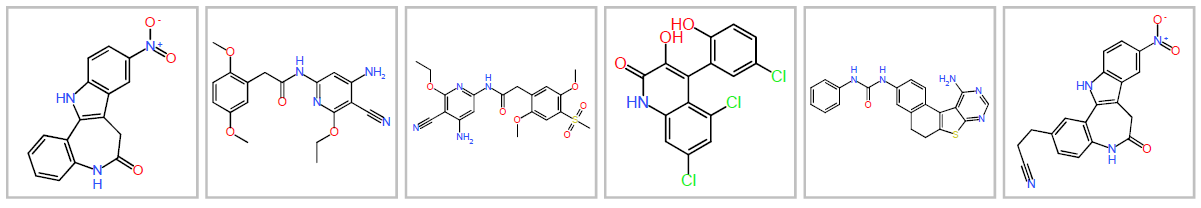


PathFp


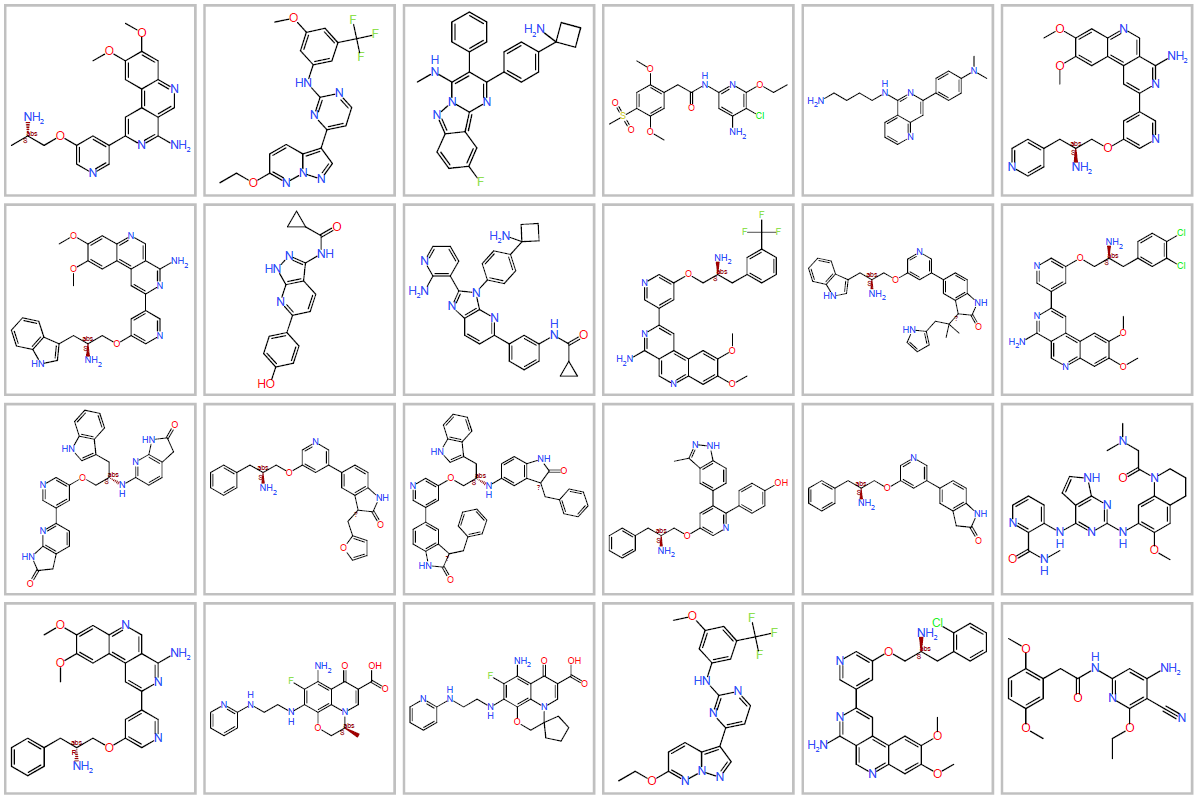

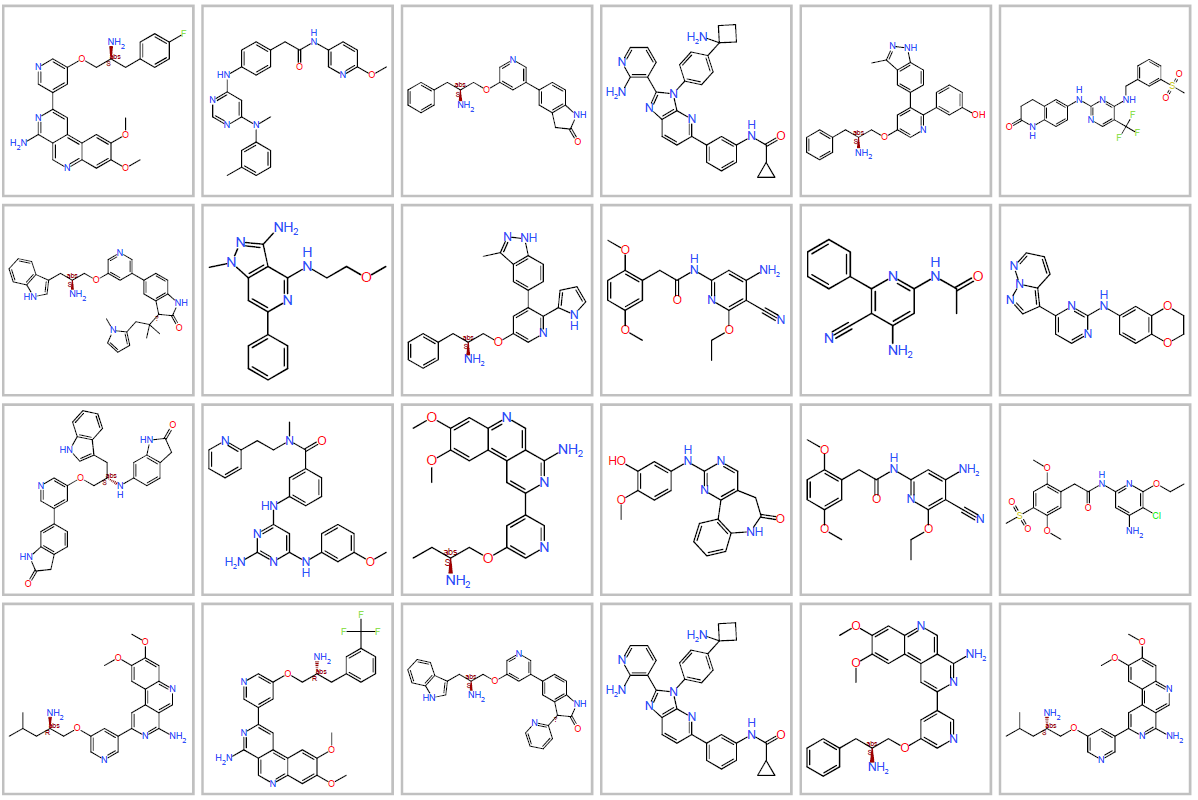

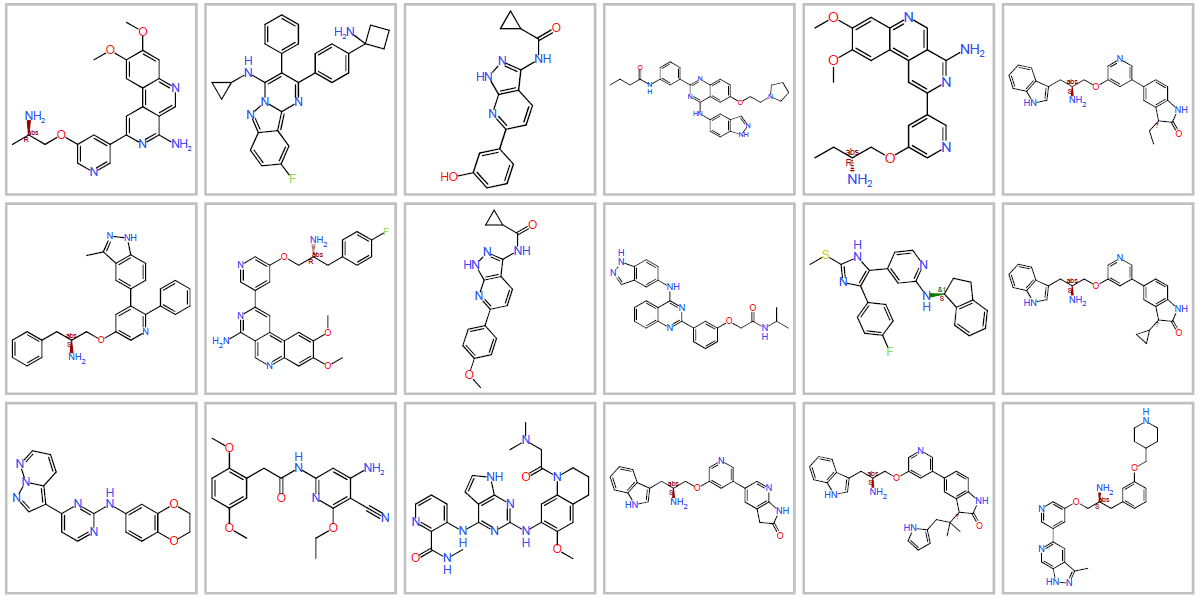

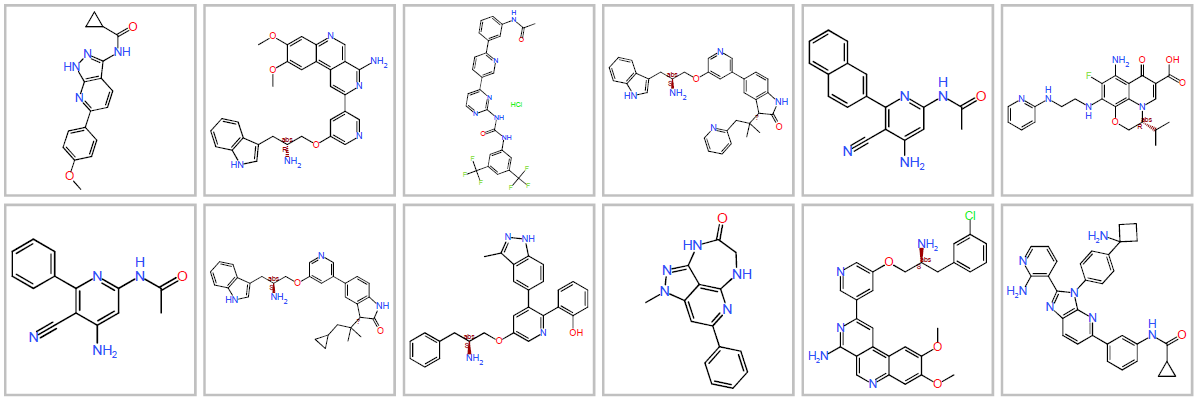


Figura S3.4. Structures with a Tanimoto coefficient of 0.6 for series E using FragFp and PathFp.
